# Supplementary material for: Phase behavior of mixed lipid monolayers on perfluorocarbon nanoemulsions and its effect on acoustic contrast
Source: Royal Society of Chemistry journal article supplement (doi:10.1039/c6ra20328k), 2016-01-01
Supplement: c6ra20328k1.pdf [file c6ra20328k1.pdf]

# Phase Behavior of Mixed Lipid Monolayers on Perfluorocarbon Nanoemulsions and its Effect on Acoustic Contrast

Rajarshi Chattaraj<sup>§</sup>, Galen M. Goldscheitter<sup>†</sup>, Adem Yildirim<sup>†</sup>, and Andrew P. Goodwin<sup>†\*</sup>

<sup>§</sup> Department of Mechanical Engineering, University of Colorado Boulder. Boulder, CO 80309.

<sup>†</sup> Department of Chemical and Biological Engineering, University of Colorado Boulder. Boulder, CO 80303.

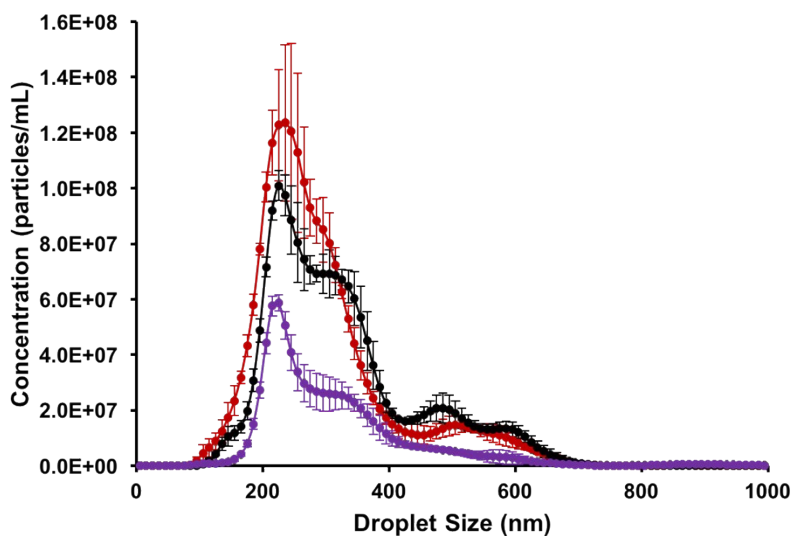

**Figure S1.** Size Distributions of 400 g fractionated PFH droplets for representative monolayer compositions (*purple*: 100:0:0; *black*: 60:30:10; *red*: 47.5:47.5:5). 1 Error bar: 1 SEM. Because concentrations must be adjusted prior to NTA, these concentrations in the figure are not the same as the as-made yields, which are calculated based on the dilution of each sample prior to NTA.

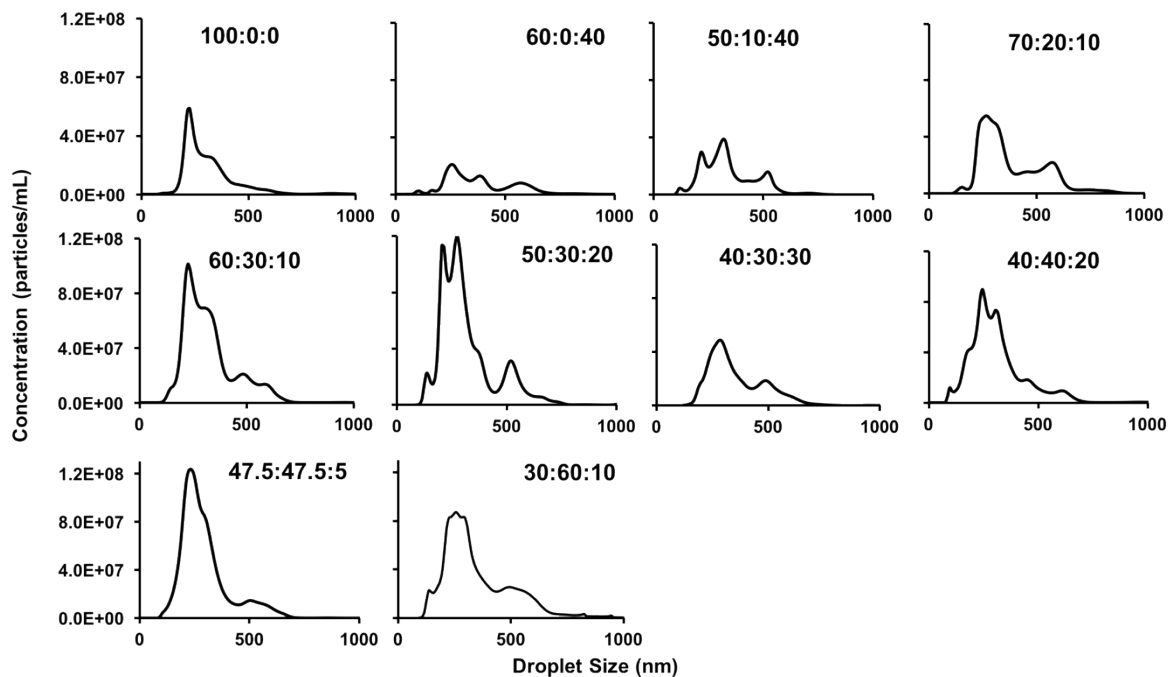

**Figure S2.** Size Distributions of 400 g fractionated PFH droplets for different monolayer compositions. Because concentrations must be adjusted prior to NTA, these concentrations in the figure are not the same as the as-made yields, which are calculated based on the dilution of each sample prior to NTA.

| Shell Composition | Mean Diameter (nm) | Std. Error (nm) | Std. Deviation (nm) |
|-------------------|--------------------|-----------------|---------------------|
|-------------------|--------------------|-----------------|---------------------|

|             |       |      |       |
|-------------|-------|------|-------|
| 100:0:0     | 335.7 | 5.2  | 142.6 |
| 60:0:40     | 371.4 | 10.0 | 148.0 |
| 50:10:40    | 336.1 | 16.2 | 116.1 |
| 70:20:10    | 380.0 | 16.4 | 150.1 |
| 60:30:10    | 318.1 | 2.4  | 117.5 |
| 50:30:20    | 312.6 | 7.2  | 127.3 |
| 40:30:30    | 351.6 | 5.4  | 128.4 |
| 40:40:20    | 302.9 | 9.0  | 126.0 |
| 47.5:47.5:5 | 289.8 | 6.2  | 110.3 |
| 30:60:10    | 343.6 | 4.4  | 152.4 |

**Table S1.** Mean diameters, standard error, and standard deviation for droplets with different shell compositions.

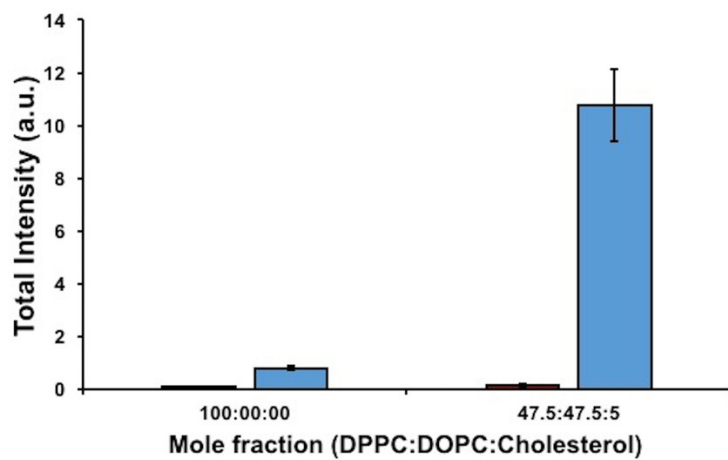

**Figure S3.** Comparison between HIFU responses of liposomes (*red*) and droplets (*blue*) for representative lipid-cholesterol compositions.

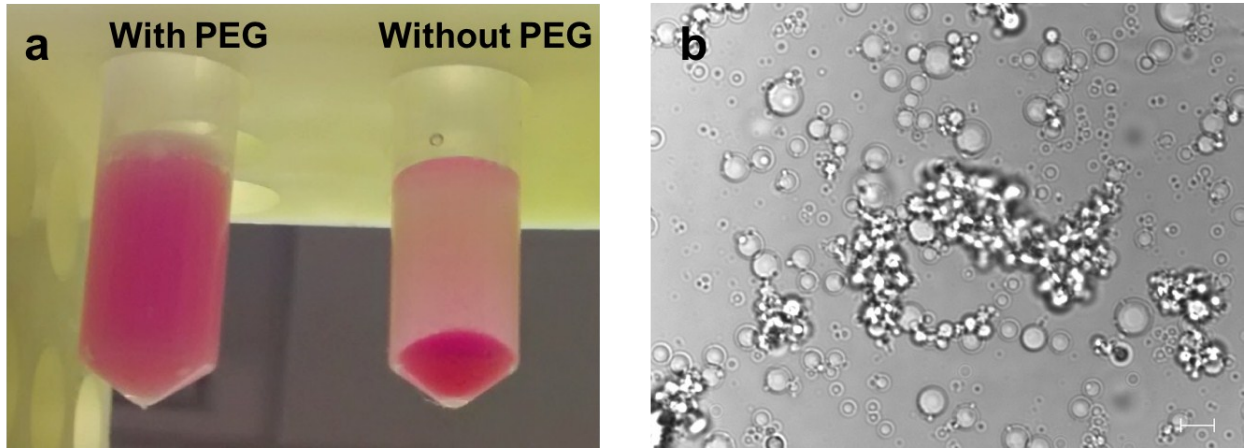

**Figure S4.** (a) 100:0:0 PFH emulsions formulated with and without DSPE-PEG2000; (b) Microscopy image of 100:0:0 PFH droplets without DSPE-PEG2000. Scale bar: 5  $\mu\text{m}$ .

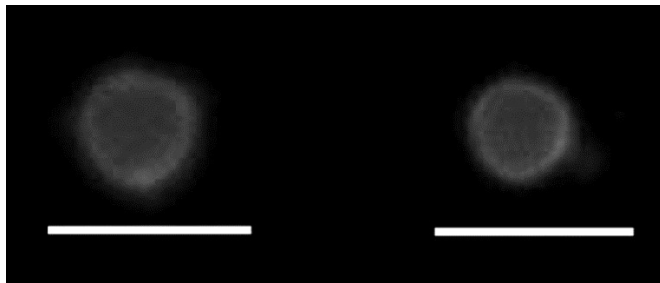

**Figure S5.** Fluorescence microscopy images of 50 g sample 47.5:47.5:5 PFH droplets with 20% (by mole) DSPE-PEG2000. Scale bar: 5  $\mu\text{m}$ .

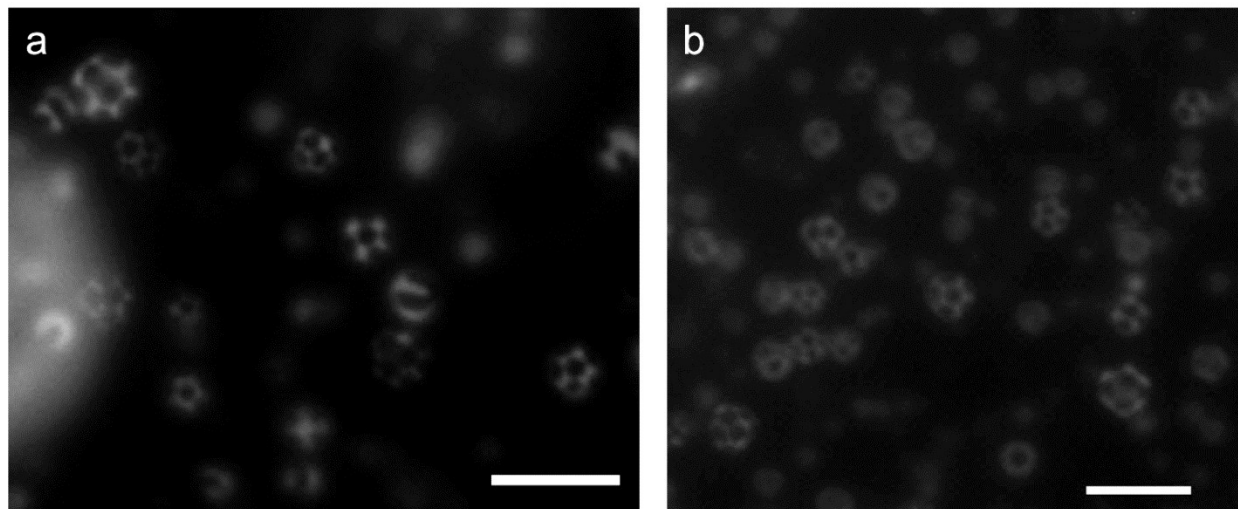

**Figure S6.** Fluorescence microscopy images of 50 g 100:0:0 PFH droplets after 30 min of heating at 37°C (**a**) and 15 min of cooling in an ice-bath (**b**) immediately after droplet preparation. Scale bar: 5  $\mu\text{m}$ .

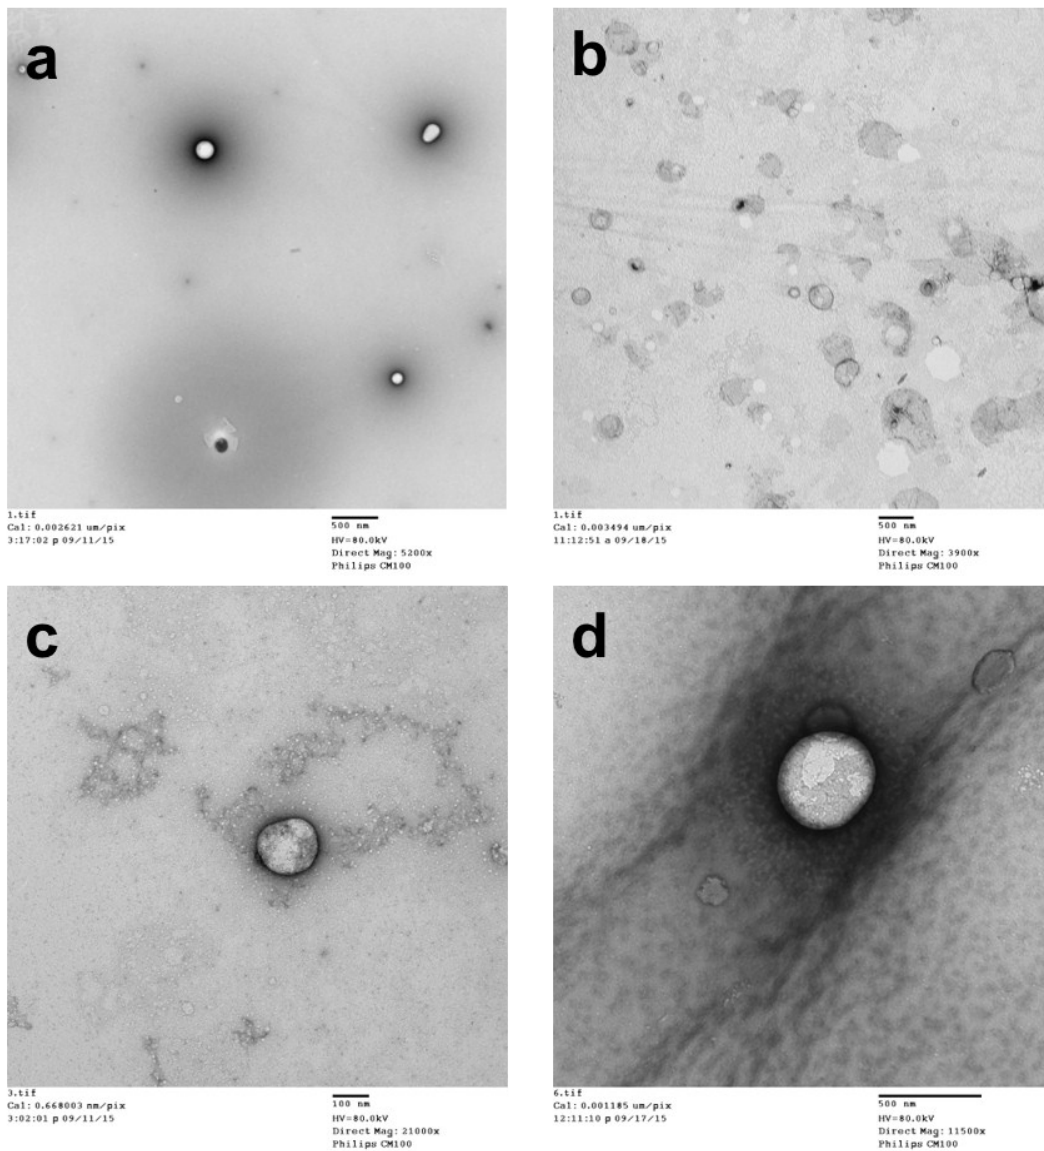

**Figure S7.** TEM images of PFH droplets of representative monolayer compositions (mole % DPPC:DOPC:Cholesterol): 100:0:0 (a), 60:30:10 (b), and 47.5:47.5:5 (c-d). Scale bars for a, b, and d: 500 nm. Scale bar for c: 100 nm.

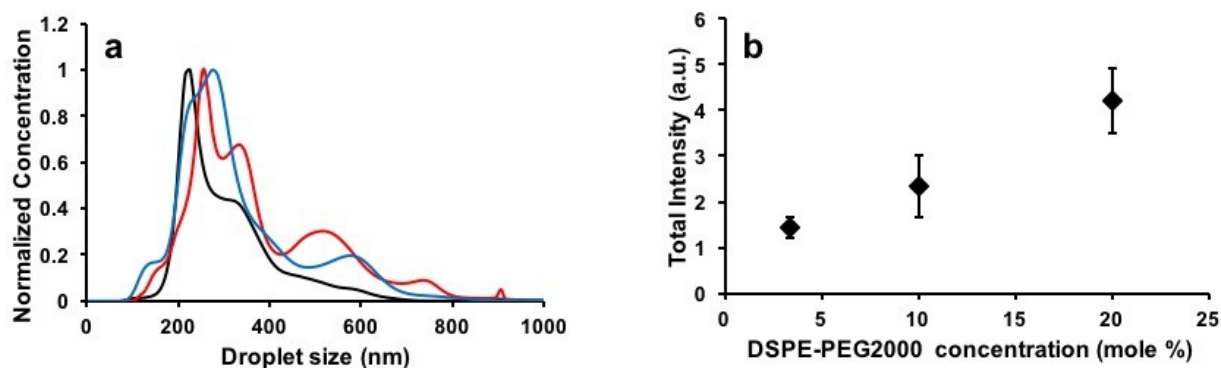

**Figure S8.** (a) Normalized size distributions of 400 g fractionated 100:0:0 droplets with 3.33% (black), 10% (red), and 20% (blue) DSPE-PEG2000 concentration; (b) HIFU response of 100:0:0 droplets of mean size 300-400 nm as a function of DSPE-PEG2000 concentration.

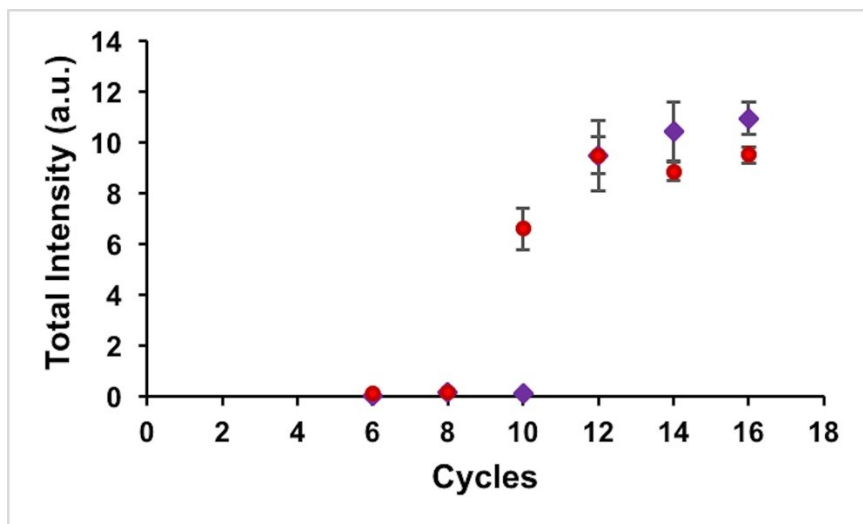

**Figure S9.** Variation of HIFU responses of 300-400 nm (mean diameter) PFH droplets, formulated out of 100:0:0 (purple diamonds) and 47.5:47.5:5 (red circles) compositions with number of HIFU cycles applied.

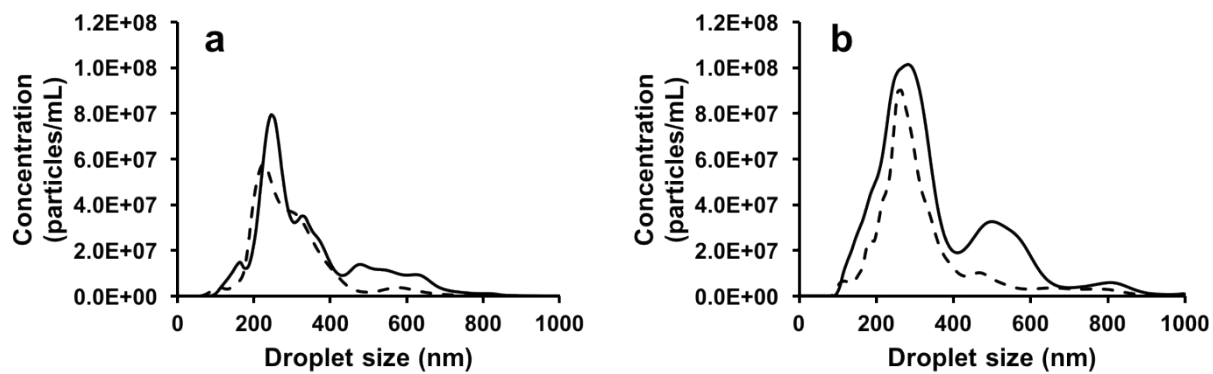

**Figure S10.** Size distributions of fractionated PFH droplets formulated out of 100:0:0 (a) and 47.5:47.5:5 (b) shell compositions; *solid line*: Day 1 of droplet preparation, *dashed line*: Day 7.
